# Supplementary material
Source: publisher site journal article supplement (https://www.dovepress.com/article/405325)
Supplement: Supplementary file 1 [file get_supplementary_file.php]

**Supplementary material**

β2-adrenoceptor agonists in asthma or chronic obstructive pulmonary disease and risk of Parkinson’s disease: nested case-control study

Anne Paakinaho, Miia Tiihonen, Heikki Koskela, Marjaana Koponen, Jari Tiihonen, Sirpa Hartikainen, Anna-Maija Tolppanen

Supplementary Table 1. Definition of asthma and COPD.

| **ICD code or classification number** | **Data source and time period** |
| --- | --- |
| **Asthma** | |
| ICD-10: J45*, J46* | Finnish Care Register for Health Care 1996-2012 |
| ICD-9: 493* | Finnish Care Register for Health Care 1987-1995 |
| ICD-8: 49300, 49302, 49308, 49309 | Finnish Care Register for Health Care 1972-1986 |
| Special reimbursement for medication: classification number 203 or 210 along with one of the abovementioned ICD-9 or ICD-10 codes | Special Reimbursement Register 1972-2012 |
| **COPD** | |
| ICD-10: J43*, J44* | Finnish Care Register for Health Care 1996-2012 |
| ICD-9: 4912A, 4912B, 492, 4920A, 4928A, 4928X | Finnish Care Register for Health Care 1987-1995 |
| ICD-8: 49104, 49201, 49202, 49209 | Finnish Care Register for Health Care 1972-1986 |
| Special reimbursement for medication: classification number 203 or 210 along with one of the abovementioned ICD-9 or ICD-10 codes | Special Reimbursement Register 1972-2012 |
| **Asthma and COPD** | |
| Abovementioned definitions were met for both asthma and COPD |  |

Abbreviations: COPD=chronic obstructive pulmonary disease; ICD=International Classification of Diseases
*Indicates that all diagnosis codes that begin with these characters are included

Supplementary Table 2. Anatomical Therapeutic Chemical (ATC) codes to define exposure to inhaled β2AR agonists, corticosteroids, and anticholinergics. DDDs are according to single active ingredient for inhaled β2AR agonists. For combination products, see World Health Organizations List of DDDs combined products.1

| **Inhaled β2AR agonists** | **ATC codes** | **DDD of single active ingredient** |
| --- | --- | --- |
| **Short-acting β2AR agonists** |  |  |
| salbutamol | R03AC02, R03AL02 | 0.8 mg (inhaled), 10 mg (nebulized) |
| terbutaline | R03AC03 | 2 mg (inhaled),  20 mg (nebulized) |
| fenoterol | R03AC04, R03AL01 | 0.6 mg (inhaled),  4 mg (nebulized) |
| **Long-acting β2AR agonists** |  |  |
| salmeterol | R03AC12, R03AK06 | 0.1 mg (inhaled) |
| formoterol | R03AC13, R03AK07, R03AK08, R03AK11, R03AL05 | 24 µg (inhaled) |
| indacaterol | R03AC18, R03AL04 | 0.15 mg (inhaled) |
| olodaterol | R03AC19 | 5 µg (inhaled) |
| vilanterol (only in combinations) | R03AK10, R03AL03 |  |
| **Inhaled corticosteroids** | **ATC codes** | **-** |
| beclometasone | R03BA01, R03AK08 |  |
| budesonide | R03BA02, R03AK07 |  |
| fluticasone propionate | R03BA05, R03AK06, R03AK11 |  |
| mometasone | R03BA07 |  |
| ciclesonide | R03BA08 |  |
| fluticasone furoate | R03AK10 |  |
| **Inhaled anticholinergics** | **ATC codes** | **-** |
| **Short-acting muscarinic antagonist** | |  |
| ipratropium bromide | R03BB01, R03AL01, R03AL02 |  |
| oxitropium bromide | R03BB02 |  |
| **Long-acting muscarinic antagonist** | |  |
| tiotropium bromide | R03BB04 |  |
| aclinidium bromide | R03BB05, R03AL05 |  |
| glycopyrronium bromide | R03BB06, R03AL04 |  |
| umeclidinium bromide | R03BB07, R03AL03 |  |

Abbreviations: β2AR=β2-adrenoceptor; DDD=defined daily dose

Reference:

1. WHOCC - List of DDDs combined products. Accessed May 17, 2022. https://www.whocc.no/ddd/list_of_ddds_combined_products/

Supplementary Table 3. Definitions of covariates.

| **ATC code, ICD code or classification number** | **Data source** |
| --- | --- |
| **Cancer history** | |
| ICD-10 code from IARC CRG Tools: C00-C97 | Cancer registry since 1972 |
| **Cardiovascular diseases** | |
| Special reimbursement for medication: classification number 201, 205, 206, 207, 213, 280 | Special Reimbursement Register since 1972 |
| **Diabetes** | |
| ICD-10: E10-E14 | Finnish Care Register for Health Care since 1996 |
| ICD-9: 250 | Finnish Care Register for Health Care 1987-1995 |
| Special reimbursement for medication: classification number 103 | Special Reimbursement Register since 1972 |
| **Traumatic brain injury** | |
| ICD-10: S06* | Finnish Care Register for Health Care since 1996 |
| ICD-9: 850-854 | Finnish Care Register for Health Care 1987-1995 |
| **Stroke** | |
| ICD-10: I60-I64 | Finnish Care Register for Health Care since 1996 |
| ICD-9: 430-432 | Finnish Care Register for Health Care 1987-1995 |
| **Substance abuse** | |
| ICD-10: F10-F19, G31.2, G62.1, G72.1, I42.6, K29.2, K70, K86.0, R78.0, T51.0, T51.1, T51.9, X45  and Reason for admission: codes 33, 71-75 | Finnish Care Register for Health Care since 1996 |
| ICD-9: 291, 292, 303-305, 980, 3575, 3594, 4255, 5353, 7903, 5710A, 5711A, 5712A, 5713A, 5713X, 5771C, 5771D  and Reason for admission: codes 33, 71-75 | Finnish Care Register for Health Care 1987-1995 |
| ATC code: N07BB, N07BC | Prescription Register since 1995 |

Abbreviations: ATC= Anatomical Therapeutic Chemical; IARC CRG= International Agency for Research on Cancer Collaborative Research Group; ICD=International Classification of Diseases
*Indicates that all diagnosis codes that begin with these characters are included

Supplementary Table 4. Exposure to inhaled corticosteroids and anticholinergics before 3-year lag among Parkinson’s disease (PD) cases and controls with asthma/chronic obstructive pulmonary disease.

|  | **Controls N=8630 n (%)** | **PD cases N=1406 n (%)** | **P** |
| --- | --- | --- | --- |
| **Inhaled corticosteroids** | 7218 (83.6) | 1176 (83.6) | 0.998 |
| beclometasone | 3264 (37.8) | 511 (36.3) | 0.29 |
| budesonide | 3665 (42.5) | 598 (42.5) | 0.96 |
| fluticasone propionate | 3490 (40.4) | 557 (39.6) | 0.56 |
| ciclesonide | 37 (0.4) | 6 (0.4) | 0.99 |
| mometasone | 2 (0.02) | - |  |
| fluticasone furoate | - | - |  |
| **Inhaled anticholinergics** | 2141 (24.8) | 359 (25.5) | 0.56 |
| **Short-acting muscarinic antagonist** | 1842 (21.3) | 308 (21.9) | 0.63 |
| ipratropium bromide | 1740 (20.2) | 299 (21.3) | 0.34 |
| oxitropium bromide | 144 (1.7) | 16 (1.1) | 0.14 |
| **Long-acting muscarinic antagonist** | 647 (7.5) | 110 (7.8) | 0.67 |
| tiotropium bromide | 647 (7.5) | 110 (7.8) | 0.67 |
| aclinidium bromide | - | - |  |
| glycopyrronium bromide | - | - |  |
| umeclidinium bromide | - | - |  |

Supplementary Table 5. Dose-response associations between use of inhaled β2AR agonists and PD, the lowest tertile as reference. β2AR agonist exposure has occurred before 3-year lag period and analyses were restricted to users only.

| **Short-acting β2AR agonists** | **Controls N=6199** | **PD cases N=1177** | **OR (95% CI)** | **Adjusteda OR (95% CI)** |
| --- | --- | --- | --- | --- |
| **n (%)** | **n (%)** |
| **Cumulative DDD** | | | | |
| 7-118 DDD | 2071 (33.4) | 385 (32.7) | Reference | Reference |
| 120-425 DDD | 2058 (33.2) | 414 (35.2) | 1.08 (0.92-1.26) | 1.07 (0.92-1.26) |
| 430-14016 DDD | 2070 (33.4) | 378 (32.1) | 0.93 (0.78-1.09) | 0.92 (0.78-1.09) |
| **Annual exposure** | |  |  |  |
| 7-41 DDD/year | 2032 (32.6) | 385 (32.7) | Reference | Reference |
| 42-88 DDD/year | 2110 (34.0) | 415 (35.3) | 1.03 (0.88-1.21) | 1.02 (0.88-1.20) |
| 89-1533 DDD/year | 2066 (33.3) | 377 (32.0) | 0.87 (0.74-1.03) | 0.86 (0.73-1.01) |
| **Long-acting β2AR agonists** | **Controls N=2240** | **PD cases N=649** | **OR (95% CI)** | **Adjusteda OR (95% CI)** |
| **n (%)** | **n (%)** |
| **Cumulative DDD** | | | | |
| 15-420 DDD | 735 (32.8) | 230 (35.4) | Reference | Reference |
| 435-1620 DDD | 747 (33.4) | 225 (34.7) | 1.01 (0.82-1.26) | 1.02 (0.82-1.27) |
| 1635-11010 DDD | 758 (33.8) | 194 (29.9) | 0.89 (0.70-1.13) | 0.89 (0.70-1.14) |
| **Annual exposure** | | | | |
| 15-140 DDD/year | 734 (32.8) | 232 (35.8) | Reference | Reference |
| 141-279 DDD/year | 730 (32.6) | 226 (34.8) | 1.02 (0.82-1.26) | 1.02 (0.82-1.27) |
| 280-1032 DDD/year | 776 (34.6) | 191 (29.4) | 0.81 (0.65-1.02) | 0.82 (0.65-1.02) |
| **Any β2AR agonist** | **Controls N=6632** | **PD cases N=1219** | **OR (95% CI)** | **Adjusteda OR (95% CI)** |
| **n (%)** | **n (%)** |
| **Cumulative DDD** | | | | |
| 6-232 DDD | 2184 (32.9) | 429 (35.2) | Reference | Reference |
| 233-1272 DDD | 2213 (33.4) | 405 (33.2) | 0.94 (0.81-1.09) | 0.93 (0.80-1.09) |
| 1275-15246 DDD | 2235 (33.7) | 385 (31.6) | 0.85 (0.73-1.00) | 0.85 (0.72-1.00) |
| **Annual exposure** | | | | |
| 6-64 DDD/year | 2196 (33.1) | 419 (34.4) | Reference | Reference |
| 65-205 DDD/year | 2204 (33.2) | 412 (33.8) | 0.97 (0.84-1.13) | 0.97 (0.83-1.13) |
| 206-1691 DDD/year | 2232 (33.7) | 388 (31.8) | 0.87 (0.74-1.02) | 0.87 (0.74-1.02) |

aCancer history, cardiovascular diseases, diabetes, socioeconomic position, stroke, substance abuse and traumatic brain injury
Abbreviations: β2AR=β2-adrenoceptor;CI=confidence interval; OR=Odds ratio; PD=Parkinson’s disease

Supplementary Table 6. Dose-response associations between use of inhaled β2AR agonists and PD, the lowest quartile as reference. Odds ratios for unadjusted model, model adjusted with standard covariates and model further adjusted with inhaled corticosteroids and anticholinergics.

| **Short-acting β2AR agonists** | **OR (95% CI)** | **Adjusteda OR (95% CI)** | **Adjustedb OR (95% CI)** |
| --- | --- | --- | --- |
| **Cumulative DDD** |  |  |  |
| 7-75 DDD | Reference | Reference | Reference |
| 78-223 DDD | 1.07 (0.90-1.28) | 1.06 (0.89-1.27) | 1.05 (0.88-1.26) |
| 225-633 DDD | 0.99 (0.82-1.18) | 0.98 (0.82-1.17) | 0.96 (0.80-1.15) |
| 635-14016 DDD | 0.84 (0.70-1.02) | 0.84 (0.69-1.02) | 0.82 (0.67-1.00) |
| **Annual exposure** |  |  |  |
| 7-33 DDD/year | Reference | Reference | Reference |
| 34-57 DDD/year | 1.01 (0.85-1.21) | 1.01 (0.85-1.20) | 1.00 (0.84-1.20) |
| 58-113 DDD/year | 0.94 (0.79-1.13) | 0.93 (0.78-1.12) | 0.92 (0.77-1.11) |
| 114-1533 DDD/year | 0.92 (0.76-1.11) | 0.91 (0.75-1.10) | 0.90 (0.74-1.09) |
| **Long-acting β2AR agonists** | **OR (95% CI)** | **Adjusteda OR (95% CI)** | **Adjustedb OR (95% CI)** |
| **Cumulative DDD** |  |  |  |
| 15-240 DDD | Reference | Reference | Reference |
| 255-900 DDD | 0.93 (0.73-1.19) | 0.94 (0.73-1.21) | 0.94 (0.73-1.20) |
| 915-2100 DDD | 0.88 (0.68-1.14) | 0.89 (0.69-1.16) | 0.89 (0.69-1.15) |
| 2115-11010 DDD | 0.88 (0.67-1.15) | 0.88 (0.67-1.16) | 0.88 (0.66-1.15) |
| **Annual exposure** |  |  |  |
| 15-105 DDD/year | Reference | Reference | Reference |
| 107-210 DDD/year | 0.90 (0.70-1.16) | 0.91 (0.71-1.17) | 0.91 (0.71-1.17) |
| 212-310 DDD/year | 0.93 (0.72-1.19) | 0.94 (0.73-1.21) | 0.93 (0.73-1.20) |
| 311-1032 DDD/year | 0.74 (0.57-0.97) | 0.75 (0.58-0.97) | 0.74 (0.57-0.97) |
| **Any β2AR agonist** | **OR (95% CI)** | **Adjusteda OR (95% CI)** | **Adjustedb OR (95% CI)** |
| **Cumulative DDD** |  |  |  |
| 6-148 DDD | Reference | Reference | Reference |
| 150-555 DDD | 1.12 (0.94-1.33) | 1.11 (0.93-1.32) | 1.08 (0.91-1.30) |
| 560-1848 DDD | 1.06 (0.89-1.27) | 1.06 (0.89-1.27) | 1.03 (0.86-1.24) |
| 1850-15246 DDD | 0.85 (0.70-1.03) | 0.85 (0.70-1.03) | 0.82 (0.67-1.01) |
| **Annual exposure** |  |  |  |
| 6-49 DDD/year | Reference | Reference | Reference |
| 50-120 DDD/year | 1.17 (0.98-1.39) | 1.16 (0.97-1.38) | 1.15 (0.96-1.37) |
| 121-259 DDD/year | 1.11 (0.92-1.33) | 1.11 (0.92-1.33) | 1.09 (0.90-1.31) |
| 260-1691 DDD/year | 0.92 (0.76-1.11) | 0.92 (0.76-1.11) | 0.90 (0.74-1.09) |

aCancer history, cardiovascular diseases, diabetes, socioeconomic position, stroke, substance abuse and traumatic brain injury
 bIn addition to a: inhaled corticosteroids and anticholinergics.
 Abbreviations: β2AR=β2-adrenoceptor; CI=confidence interval; OR=Odds ratio; PD=Parkinson’s disease
